# Supplementary material for: Identification and characterization of circRNAs in Pyrus betulifolia Bunge under drought stress
Source: PLoS One. 2018 Jul 17;13(7):e0200692. doi: 10.1371/journal.pone.0200692 (PMC6049930; doi:10.1371/journal.pone.0200692)
Supplement: S5 File — (XLS) [file pone.0200692.s005.xls]

#KEGG_n	12	KEGG_N	5639
#Pathway	ko_ID	DIFFgene	gene	DIFFgene_all	gene_all
Citrate cycle (TCA cycle)	ko00020	1	91	12	5639	Pbr022545	K01648
Tropane, piperidine and pyridine alkaloid biosynthesis	ko00960	2	23	12	5639	Pbr018958;Pbr018959	K08081+K08081
Circadian rhythm - mammal	ko04710	1	18	12	5639	Pbr011232	K03347
Ribosome	ko03010	2	366	12	5639	Pbr023697;Pbr023698	K02989+K02989
Valine, leucine and isoleucine degradation	ko00280	1	67	12	5639	Pbr022539	K00826
Protein processing in endoplasmic reticulum	ko04141	3	272	12	5639	Pbr011232;Pbr019003;Pbr019005	K03347+K13525+K13525
Valine, leucine and isoleucine biosynthesis	ko00290	1	65	12	5639	Pbr022539	K00826
Ubiquitin mediated proteolysis	ko04120	2	158	12	5639	Pbr011232;Pbr038316	K03347+K10143
Pantothenate and CoA biosynthesis	ko00770	1	41	12	5639	Pbr022539	K00826
RNA transport	ko03013	2	257	12	5639	Pbr018440;Pbr018442	K03260+K03260
